# Supplementary material for: Lyngbyoic acid, a “tagged” fatty acid from a marine cyanobacterium, disrupts quorum sensing in Pseudomonas aeruginosa
Source: Royal Society of Chemistry journal article supplement (doi:10.1039/c0mb00180e), 2011-01-24

## Supporting Information

# Lyngbyoic Acid, a “Tagged” Fatty Acid from a Marine Cyanobacterium, Disrupts Quorum Sensing in *Pseudomonas aeruginosa*

*Jason C. Kwan, Theresa Meickle, Dheran Ladwa, Max Teplitski, Valerie Paul, and Hendrik Luesch*

Department of Medicinal Chemistry, University of Florida, 1600 SW Archer Road, Gainesville, Florida  
32610, Smithsonian Marine Station, 701 Seaway Drive, Fort Pierce, Florida 34949, Department of  
Pharmacy and Pharmacology, University of Bath, Bath, BA2 7AY, U. K., and Soil and Water Science  
Department, Genetics Institute, University of Florida-Institute of Food and Agricultural Sciences,  
Gainesville, Florida 32610

| Contents                                                                                                            | Page Number |
|---------------------------------------------------------------------------------------------------------------------|-------------|
| Figure S1. Treatment of the <i>lacZ</i> -based <i>A. tumefaciens</i> TraR reporter with lyngbyoic acid ( <b>4</b> ) | S 3         |
| Figure S2. Treatment of constitutively active reporter pTIM2442 with lyngbyoic acid ( <b>4</b> )                    | S 3         |
| Figure S3. Growth curves of <i>P. aeruginosa</i> PAO1 treated with EtOH and lyngbyoic acid ( <b>4</b> )             | S 3         |
| Figure S4. Lineweaver-Burke plot of LasB inhibition by lyngbyoic acid ( <b>4</b> )                                  | S 4         |
| Scheme S1. Effects of lyngbyoic acid ( <b>4</b> ) on selected genes                                                 | S 5         |
| Table S1. Strains and plasmids used in this study                                                                   | S 7         |
| Table S2. Iron-regulated genes that are affected by lyngbyoic acid ( <b>4</b> )                                     | S 8         |
| Table S3. Primers and probes used for RT-qPCR in this study                                                         | S 9         |
| Table S4. Validation of GeneChip experiment by RT-qPCR                                                              | S 9         |
| Supplementary References                                                                                            | S 10        |
| <sup>1</sup> H NMR spectrum of lyngbyoic acid ( <b>4</b> ) in CDCl <sub>3</sub> , 500 MHz                           | S 11        |
| APT spectrum of lyngbyoic acid ( <b>4</b> ) in CDCl <sub>3</sub> , 100 MHz                                          | S 12        |
| COSY spectrum of lyngbyoic acid ( <b>4</b> ) in CDCl <sub>3</sub> , 500 MHz                                         | S 13        |
| HMQC spectrum of lyngbyoic acid ( <b>4</b> ) in CDCl <sub>3</sub> , 500 MHz                                         | S 14        |
| HMBC spectrum of lyngbyoic acid ( <b>4</b> ) in CDCl <sub>3</sub> , 500 MHz (Aliphatic region)                      | S 15        |
| HMBC spectrum of lyngbyoic acid ( <b>4</b> ) in CDCl <sub>3</sub> , 500 MHz (Carbonyl region)                       | S 16        |
| TOCSY spectrum of lyngbyoic acid ( <b>4</b> ) in CDCl <sub>3</sub> , 500 MHz                                        | S 17        |

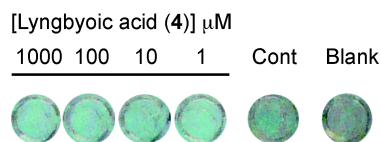

**Figure S1.** Treatment of the *lacZ*-based *A. tumefaciens* TraR reporter with **4** in the presence of 1 nM 3-oxo- $\text{C}_8$ -HSL. “Cont” refers to wells treated with 3-oxo- $\text{C}_8$ -HSL alone, and “Blank” refers to untreated wells.

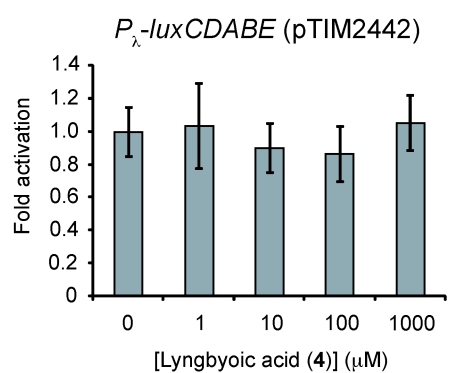

**Figure S2.** Treatment of constitutively active reporter pTIM2442 with **4**.

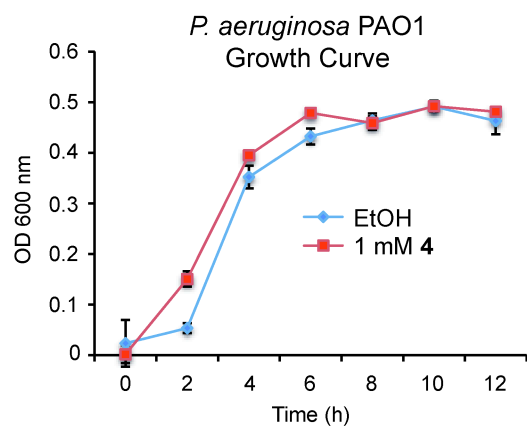

**Figure S3.** Growth curves of *P. aeruginosa* PAO1 treated with EtOH and lyngbyoic acid (**4**).

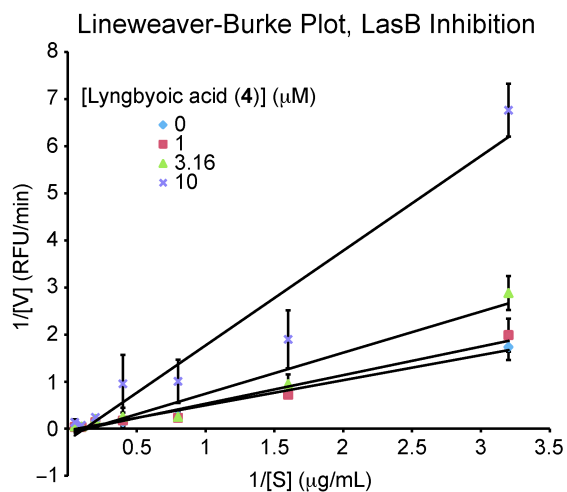

**Figure S4.** Lineweaver-Burke plot of LasB inhibition by lyngbyic acid (4)

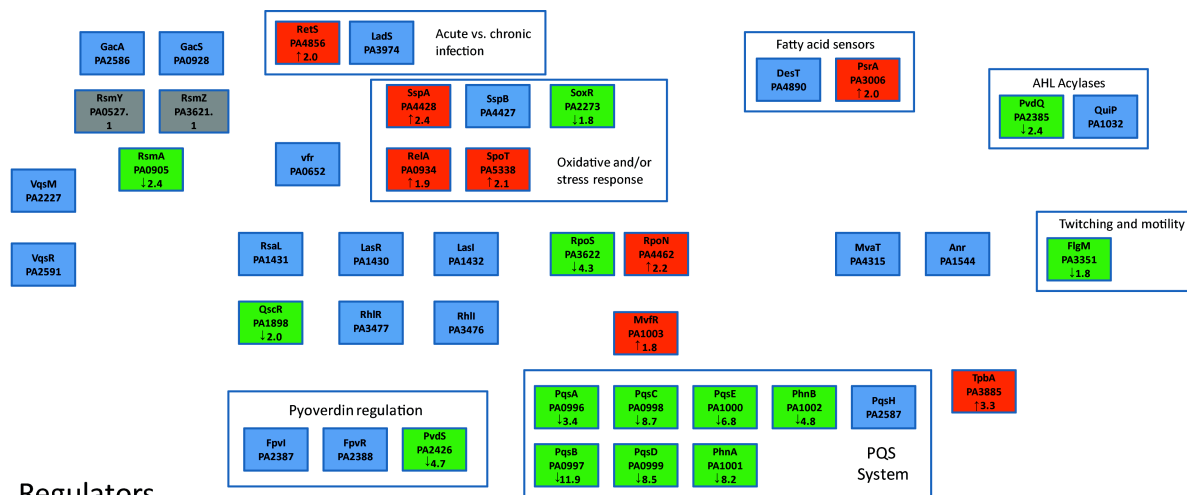

Downstream effects

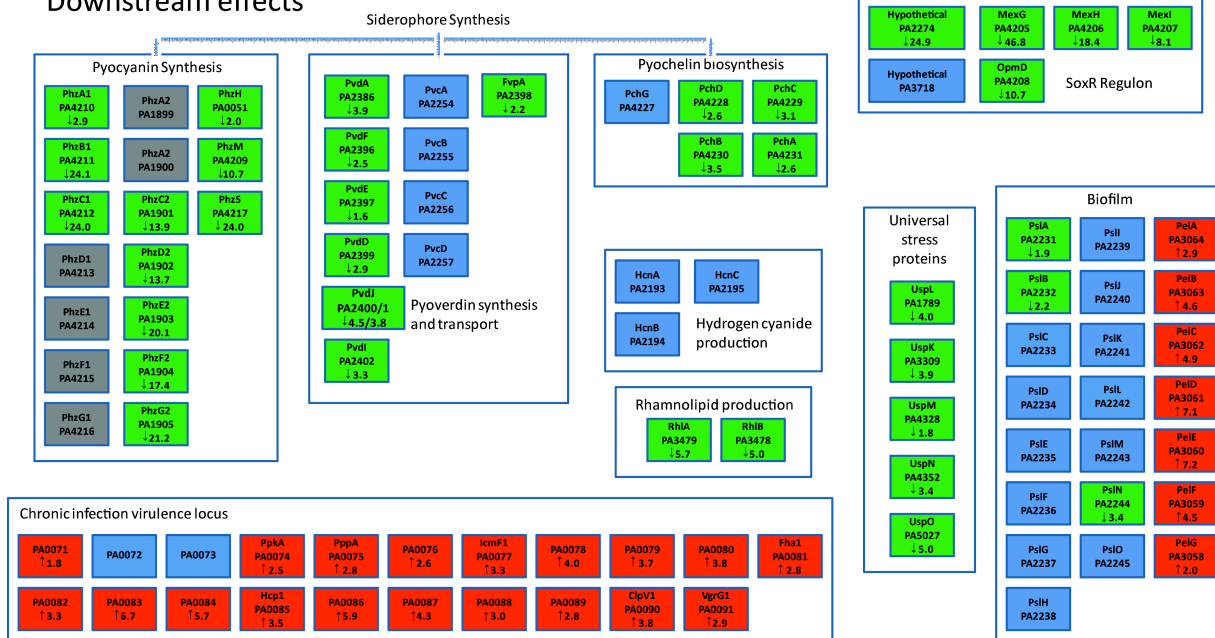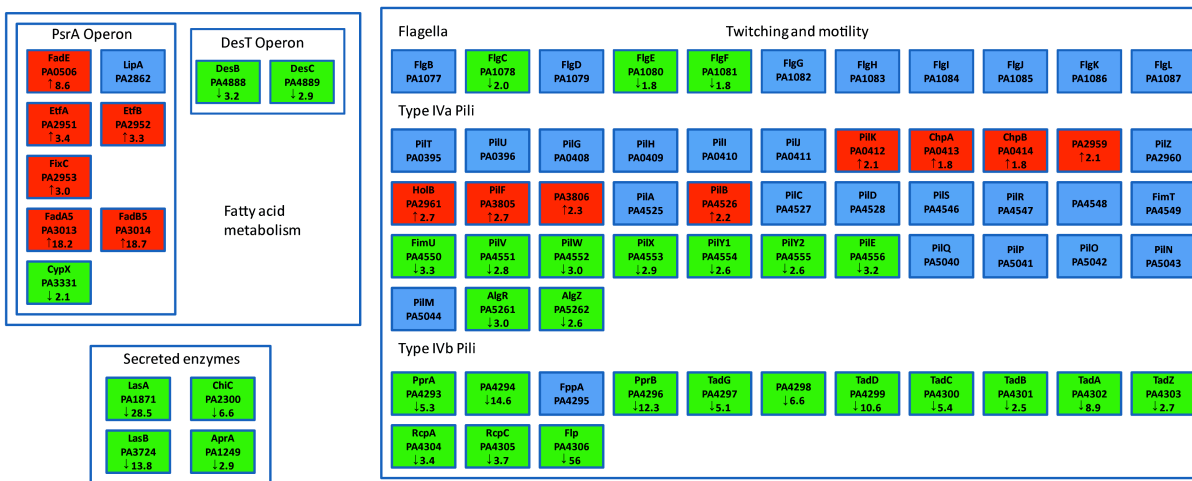

**Scheme S1.** Effects of lyngbyoic acid (**4**) on selected genes, categorized according to function. Green boxes depict downregulated transcripts, red boxes depict upregulated transcripts and blue boxes depict genes whose expression level was not significantly changed. Grey boxes depict small non-coding RNAs for which there were no probes on the microarray and also some pyocyanin biosynthetic genes which are identical to other genes (on the *P. aeruginosa* chromosome there are two copies of the *phzABCDEFG* operon).

Lyngbyoic acid (**4**) affected genes under the control of two fatty acid sensors, DesT (PA4890)<sup>1</sup> and PsrA (PA3006),<sup>2</sup> and also the level of *psrA* transcript was increased (+2.0 fold). Consistent with activation of the repressor DesT, the transcript levels of desaturases *desB* (PA4888) and *desC* (PA4889) were reduced (−3.2 and −2.9 fold, respectively). The fatty acid metabolism genes under control of the activator PsrA were upregulated, except for *lipA*, which could be a result of a direct action on PsrA or of its increased expression.

Compound **4** appeared to have complex effects on oxidative and/or stress response regulators. Transcripts of *relA* (PA0934), *spoT* (PA5338), and *sspA* (PA4428) were all upregulated (+1.9 to +2.4-fold). Also downregulated are the universal stress proteins *uspK* (PA3309, −3.9-fold), *uspN* (PA4352, −3.4-fold), *uspL* (PA1789, −4-fold), *uspM* (PA4328, −1.8-fold) and *uspO* (PA5027, −5-fold). PA3309 was shown to be under control of the oxygen-sensing regulator Anr<sup>3</sup> (PA1544, no change in expression), while the other *usp* genes are dependent on SpoT.<sup>4</sup> Two genes encoding arginine fermentation genes, ArcB and C (PA5172–PA5173), were also downregulated (−1.9 and −2.4-fold, respectively). These genes were previously shown to be upregulated during anaerobic growth.<sup>3</sup> Another oxidative stress regulator, *soxR* (PA2273), was downregulated (−1.8-fold), as was the majority of its known regulon,<sup>5</sup> the *mexGHID* efflux pump (PA4205–8, −8.1 to −46.8-fold) and the hypothetical protein PA2274 (−24.9-fold). This regulon has previously been identified as QS-controlled,<sup>6</sup> and thus downregulation could be a result of general QS inhibition as well as reduction of *soxR*. Additionally, it has been shown that pyocyanin itself is able to activate SoxR,<sup>7</sup> and thus some of the effect could be accounted for by reduced amounts of this metabolite. Overall, it would seem that **4** negatively regulates stress responses in PAO1.

**Table S1.** Strains and plasmids used in this study

| Strain                                | Relevant Characteristics                                                                                                                                                                                              | Receptor                                 | Cognate AHL                | Source                             |
|---------------------------------------|-----------------------------------------------------------------------------------------------------------------------------------------------------------------------------------------------------------------------|------------------------------------------|----------------------------|------------------------------------|
| <i>Escherichia coli</i> JM109         |                                                                                                                                                                                                                       |                                          |                            |                                    |
| pSB401                                | <i>luxR</i> <sup>+</sup> P <sub>luxI</sub> - <i>luxCDABE</i> ; Tet <sup>r</sup> p15A origin                                                                                                                           | LuxR                                     | 3-oxo-C <sub>6</sub> -HSL  | Winson et al. 1998 <sup>8</sup>    |
| pSB536                                | <i>ahyR</i> <sup>+</sup> P <sub>ahyI</sub> - <i>luxCDABE</i> ; Amp <sup>r</sup> ColE1 origin                                                                                                                          | AhyR                                     | C <sub>4</sub> -HSL        | Winson et al. 1998 <sup>8</sup>    |
| pSB1075                               | <i>lasR</i> <sup>+</sup> P <sub>lasI</sub> - <i>luxCDABE</i> ; Amp <sup>r</sup> ColE1 origin                                                                                                                          | LasR                                     | 3-oxo-C <sub>12</sub> -HSL | Winson et al. 1998 <sup>8</sup>    |
| pTIM505                               | P <sub>lasI</sub> - <i>luxCDABE</i> ; Amp <sup>r</sup> ColE1 origin                                                                                                                                                   | -                                        |                            | Rajamani et al. 2008 <sup>9</sup>  |
| pTIM5211                              | <i>lasR</i> <sup>+</sup> , Kan <sup>r</sup> ColE1 origin                                                                                                                                                              | LasR                                     |                            | Alagely et al. 2010 <sup>10</sup>  |
| pTIM5319                              | <i>lasR</i> <sup>+</sup> (ΔS13-S172), P <sub>lasI</sub> - <i>luxCDABE</i> ; Amp <sup>r</sup> ColE1 origin                                                                                                             | Truncated LasR, lacks AHL-binding domain |                            | Rajamani et al. 2008 <sup>9</sup>  |
| <i>Escherichia coli</i> DH5α          |                                                                                                                                                                                                                       |                                          |                            |                                    |
| pTIM2442                              | P <sub>λ</sub> - <i>luxCDABE</i> ; Amp <sup>r</sup> ColE1 origin<br><br>Contains nt770-893 of pWD42-09, locus AF129072 cloned upstream of promoterless <i>luxCDABE</i> cassette. Constitutively luminescent construct | -                                        |                            | Alagely et al. 2010 <sup>10</sup>  |
| <i>Agrobacterium tumefaciens</i> NT1  |                                                                                                                                                                                                                       |                                          |                            |                                    |
| pZLR4                                 | <i>traR</i> <sup>+</sup> <i>traG</i> :: <i>lacZ</i> ; Gm <sup>r</sup>                                                                                                                                                 | TraR                                     | 3-oxo-C <sub>8</sub> -HSL  | Shaw et al. 1997 <sup>11</sup>     |
| <i>Pseudomonas aeruginosa</i> PAO1    |                                                                                                                                                                                                                       |                                          |                            |                                    |
|                                       | Wild-type <i>P. aeruginosa</i>                                                                                                                                                                                        | LasR                                     | 3-oxo-C <sub>12</sub> -HSL | Holloway et al. 1979 <sup>12</sup> |
|                                       |                                                                                                                                                                                                                       | RhlR                                     | C <sub>4</sub> -HSL        |                                    |
| <i>Pseudomonas aeruginosa</i> PAO-JP2 |                                                                                                                                                                                                                       |                                          |                            |                                    |
|                                       | Δ <i>lasI</i> Δ <i>rhlI</i>                                                                                                                                                                                           | LasR                                     | 3-oxo-C <sub>12</sub> -HSL | Pesci et al. 1997 <sup>13</sup>    |
|                                       |                                                                                                                                                                                                                       | RhlR                                     | C <sub>4</sub> -HSL        |                                    |

**Table S2.** Iron-regulated genes<sup>a</sup> that are affected by lynnbyoic acid (4)

| Gene   | Gene name | Fold Change | Annotation                                               |
|--------|-----------|-------------|----------------------------------------------------------|
| PA0266 | gabT      | -1.9        | 4-aminobutyrate aminotransferase                         |
| PA0471 |           | -1.9        | Probable transmembrane sensor                            |
| PA0500 | bioB      | 2.9         | Biotin synthase                                          |
| PA0672 | hemO      | -4.2        | Heme oxygenase                                           |
| PA1003 | mvfR      | 1.8         | Transcriptional regulator                                |
| PA1249 | aprA      | -2.9        | Alkaline metalloproteinase precursor                     |
| PA2112 |           | 36.1        | Conserved hypothetical protein                           |
| PA2384 |           | -2.4        | Hypothetical protein                                     |
| PA2385 | pvdQ      | -2.4        | 3-oxo-C <sub>12</sub> -homoserine lactone acylase        |
| PA2386 | pvdA      | -3.9        | L-ornithine N5-oxygenase                                 |
| PA2394 | pvdN      | -2.5        |                                                          |
| PA2395 | pvdO      | -3.8        |                                                          |
| PA2396 | pvdF      | -2.5        | Pyoverdine synthetase                                    |
| PA2398 | fpvA      | -2.2        | Ferripyoverdine receptor                                 |
| PA2399 | pvdD      | -2.9        | Pyoverdine synthetase                                    |
| PA2400 | pvdJ      | -4.5        |                                                          |
| PA2401 | pvdJ      | -3.4        |                                                          |
| PA2402 |           | -3.3        | Probable NRPS                                            |
| PA2403 |           | -2.2        | Hypothetical protein                                     |
| PA2411 |           | -7.5        | Probable thioesterase                                    |
| PA2413 | pvdH      | -9.4        | L-2,4-diaminobutyrate:2-ketoglutarate 4-aminotransferase |
| PA2424 | pvdL      | -2.3        |                                                          |
| PA2426 | pvdS      | -4.7        | Sigma factor                                             |
| PA3165 | hisC2     | 2.2         | Histidinol-phosphate aminotransferase                    |
| PA3530 |           | -5.7        | Conserved hypothetical protein                           |
| PA4175 | prpL      | -2.7        | PvdS regulated endoprotease (keratitis etc.)             |
| PA4228 | pchG      | -2.6        | Pyochelin biosynthetic protein                           |
| PA4229 | pchC      | -3.1        | Pyochelin biosynthetic protein                           |
| PA4230 | pchB      | -3.5        | Salicylate biosynthesis protein                          |
| PA4231 | pchA      | -2.6        | Salicylate biosynthesis isochorismate synthase           |
| PA4357 | ssb       | -3.4        | Conserved hypothetical protein                           |
| PA4359 |           | -5.0        | Probable MFS transporter                                 |
| PA4468 | sodM      | -4.1        | Superoxide dismutase                                     |
| PA4469 |           | -6.3        | Hypothetical protein                                     |
| PA4470 | fumC1     | -4.4        | Fumarate hydratase                                       |
| PA4471 |           | -2.0        | Hypothetical protein                                     |
| PA4500 |           | 5.2         | Probable binding component of ABC transporter            |
| PA4570 |           | -3.9        | Hypothetical protein                                     |
| PA4708 | phuT      | -2.3        | Heme transport protein                                   |
| PA4709 |           | -2.4        | Probable hemin degrading factor                          |
| PA5314 |           | -2.6        | Hypothetical protein                                     |
| PA5531 | tonB      | 1.8         | ton B                                                    |

<sup>a</sup>Genes previously identified as upregulated under iron-starvation in a microarray study.<sup>14</sup>



**Table S3.** Primers and probes used for RT-qPCR in this study

| Gene                  | Forward                     | Reverse                     | Probe                  |
|-----------------------|-----------------------------|-----------------------------|------------------------|
| <i>lasB</i> (PA3724)  | 5'-GCCTATTCGCCGCTGAAC-3'    | 5'-AGTCCCGGTACAGTTGAACAC-3' | 5'-ACGCGCATTTCCTC-3'   |
| <i>phzG1</i> (PA4216) | 5'-CCCGCCGGGCTACTG-3'       | 5'-GCTTCCAGCCTCCTTCGT-3'    | 5'-ACTCCAGGCACAGTTC-3' |
| <i>retS</i> (PA4856)  | 5'-ACGCCAGCGGCTGAT-3'       | 5'-TCGCTGGTGCCTGTT-3'       | 5'-CCAGCAGCTCAACCTG-3' |
| <i>fadA5</i> (PA3013) | 5'-GGCATGATGGGCCTGACT-3'    | 5'-CGCCTCACGGCTGATACC-3'    | 5'-TCTTGCCGAGCATTTC-3' |
| <i>lasR</i> (PA1430)  | 5'-TCCATCTACCAGACGCGAAAG-3' | 5'-CGGCCGAGGCTTCCT-3'       | 5'-CAGCACGAGTTCTTCG-3' |
| <i>rpoD</i> (PA0576)  | 5'-GCGAGCGCATGGACATG-3'     | 5'-GGCTCTTTGGCGATCTTCAGT-3' | 5'-ACCTTGCGGATCTTGT-3' |
| <i>rpsL</i> (PA4268)  | 5'-CTGCGTAAGGTATGCCGTGTA-3' | 5'-CACCGATGTACGAGGAAACCT-3' | 5'-CTGACCAACGGTTTCG-3' |

**Table S4.** Validation of GeneChip experiment by RT-qPCR

| Gene                  | Fold change (RT-qPCR) | Fold change (GeneChip) |
|-----------------------|-----------------------|------------------------|
| <i>lasB</i> (PA3724)  | -34.9                 | -13.8                  |
| <i>phzG1</i> (PA4216) | -13.5                 | -21.2                  |
| <i>retS</i> (PA4856)  | +2.2                  | +2.0                   |
| <i>fadA5</i> (PA3013) | +28.7                 | +18.2                  |
| <i>lasR</i> (PA1430)  | +1.05                 | +1.02                  |

### Supplementary References

- 1 K. Zhu, K.-H. Choi, H. P. Schweizer, C. O. Rock, Y.-M. Zhang, *Mol. Microbiol.* 2006, **60**, 260–273.
- 2 Y. Kang, D. T. Nguyen, M. S. Son, T. T. Hoang, *Microbiol.* 2008, **154**, 1584–1598.
- 3 K. Schreiber, N. Boes, M. Eschbach, L. Jaensch, J. Wehland, T. Bjarnsholt, M. Givskov, M. Hentzer, M. Schobert, *J. Bacteriol.* 2006, **188**, 659–668.
- 4 N. Boes, K. Schreiber, M. Schobert, *J. Bacteriol.* 2008, **190**, 7189–7199.
- 5 M. Palma, J. Zurita, J. A. Ferreras, S. Worgall, D. H. Larone, L. Shi, F. Campagne, L. E. N. Quadri, *Infect. Immun.* 2005, **73**, 2958–2966.
- 6 M. Schuster, C. P. Lostroh, T. Ogi, E. P. Greenberg, *J. Bacteriol.* 2003, **185**, 2066–2079.; V. E. Wagner, D. Bushnell, L. Passador, A. I. Brooks, B. H. Iglewski, *J. Bacteriol.* 2003, **185**, 2080–2095.
- 7 L. E. P. Dietrich, A. Price-Whelan, A. Petersen, M. Whiteley, D. K. Newman, *Mol. Microbiol.* 2006, **61**, 1308–1321.
- 8 M. K. Winson, S. Swift, L. Fish, J. P. Throup, F. Jørgensen, S. R. Chhabra, B. W. Bycroft, P. Williams, G. S. A. B. Stewart, *FEMS Microbiol. Lett.* 1998, **163**, 185–192.
- 9 S. Rajamani, W. D. Bauer, J. B. Robinson, J. M. Farrow, E. C. Pesci, M. Teplitski, M. Gao, R. T. Sayre, D. A. Phillips, *Mol. Plant-Microbe Interact.* 2008, **21**, 1184–1192.
- 10 A. Alagely, S. Rajamani, M. Teplitski, *Methods Mol. Biol.* 2011, **692**, 113–130.
- 11 P. D. Shaw, G. Ping, S. L. Daly, C. Cha, J. E. Cronan, K. L. Rinehart, S. K. Farrand, *Proc. Natl. Acad. Sci. U. S. A.* 1997, **94**, 6036–6041.
- 12 B. W. Holloway, V. Krishnapillai, A. F. Morgan, *Microbiol. Rev.* 1979, **43**, 73–102.
- 13 E. C. Pesci, J. P. Pearson, P. C. Seed, B. H. Iglewski, *J. Bacteriol.* 1997, **179**, 3127–3132.
- 14 M. Palma, S. Worgall, L. E. N. Quadri, *Arch. Microbiol.* 2003, **180**, 374–379.

# $^1\text{H}$ NMR Spectrum of Lyngbyoic Acid (**4**) in $\text{CDCl}_3$ , 500 MHz

S 11

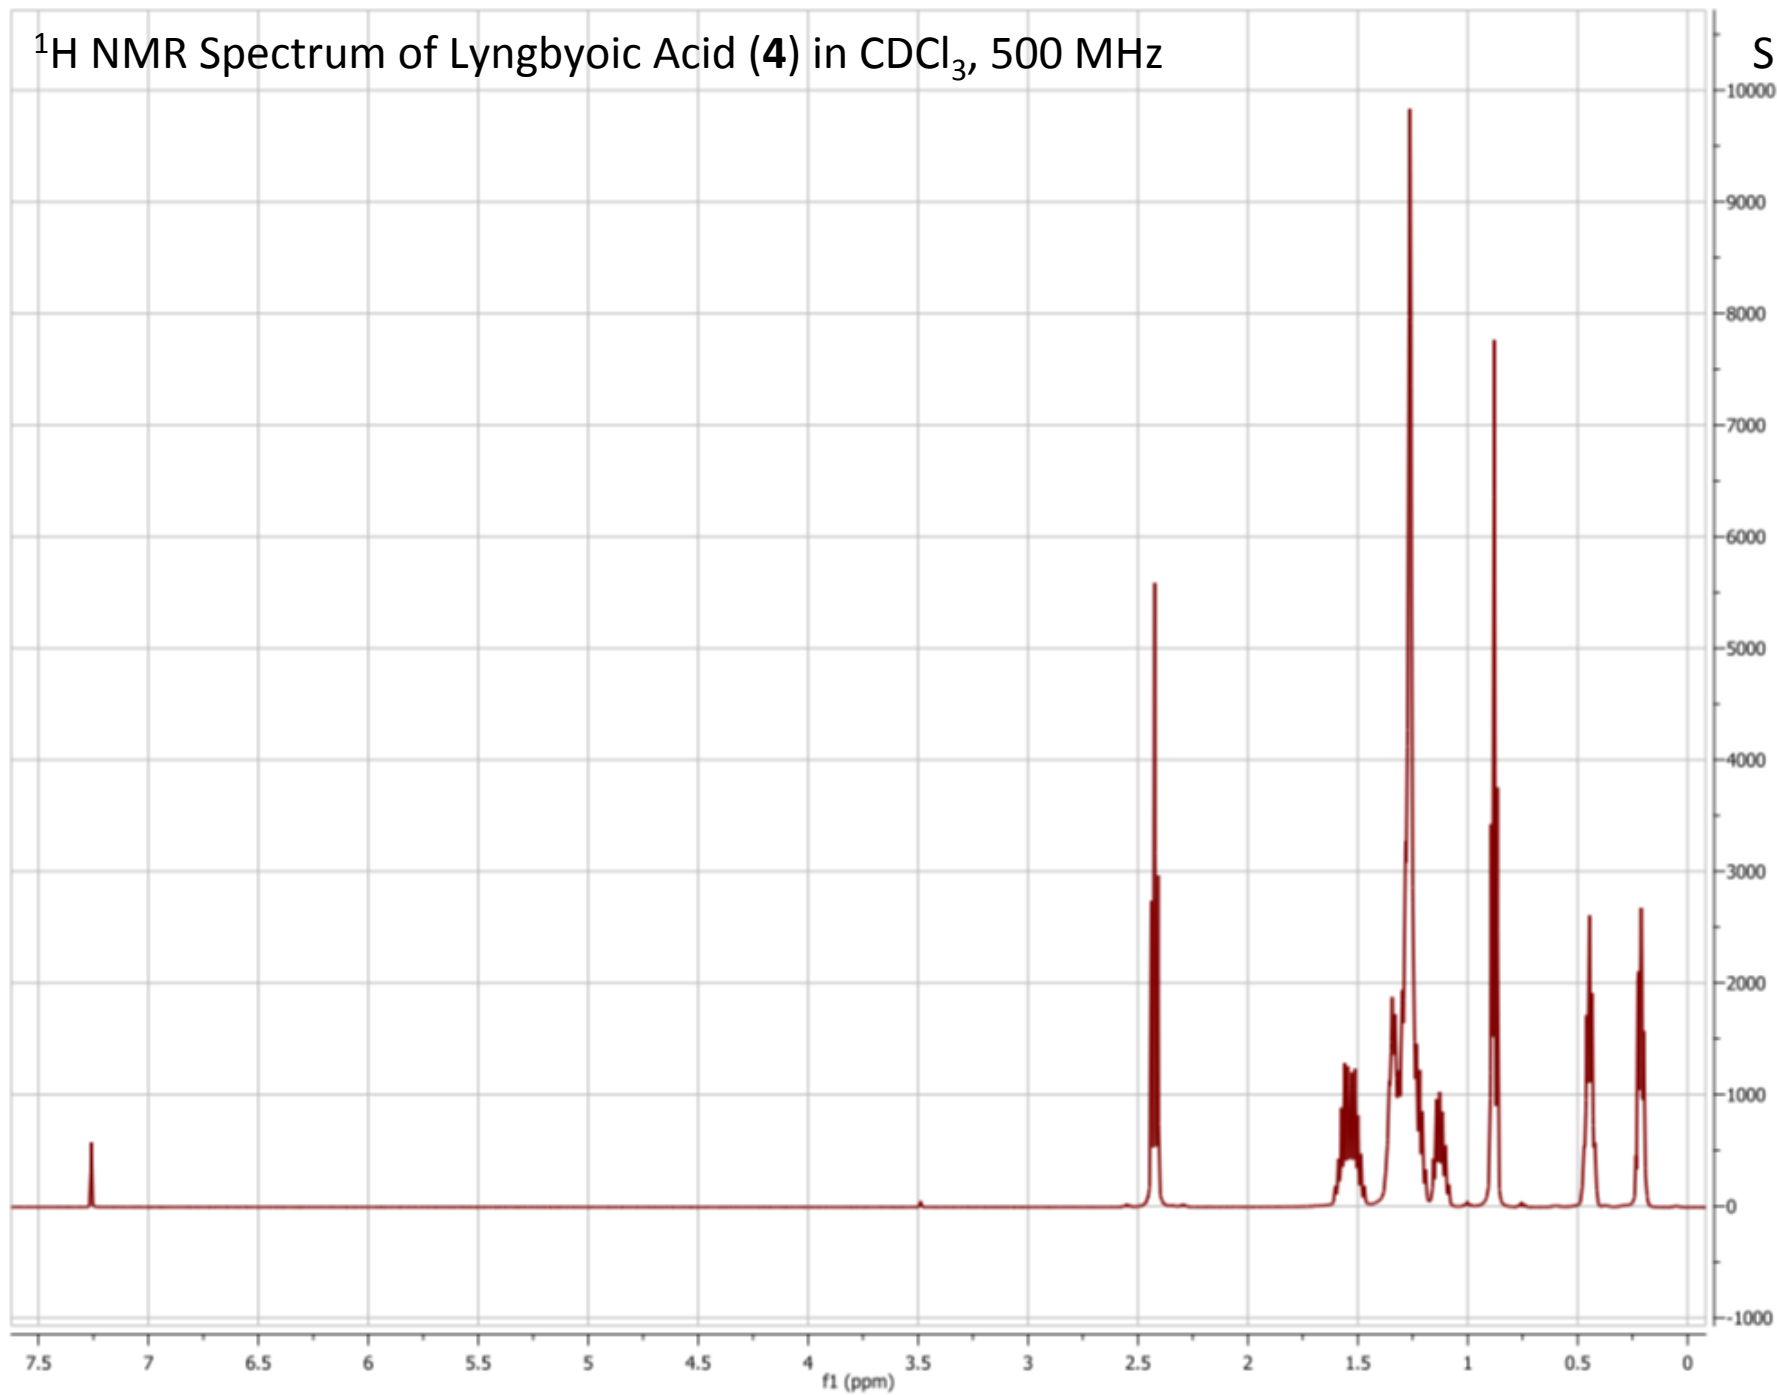

# APT Spectrum of Lyngbyoic Acid (**4**) in CDCl<sub>3</sub>, 100 MHz

S 12

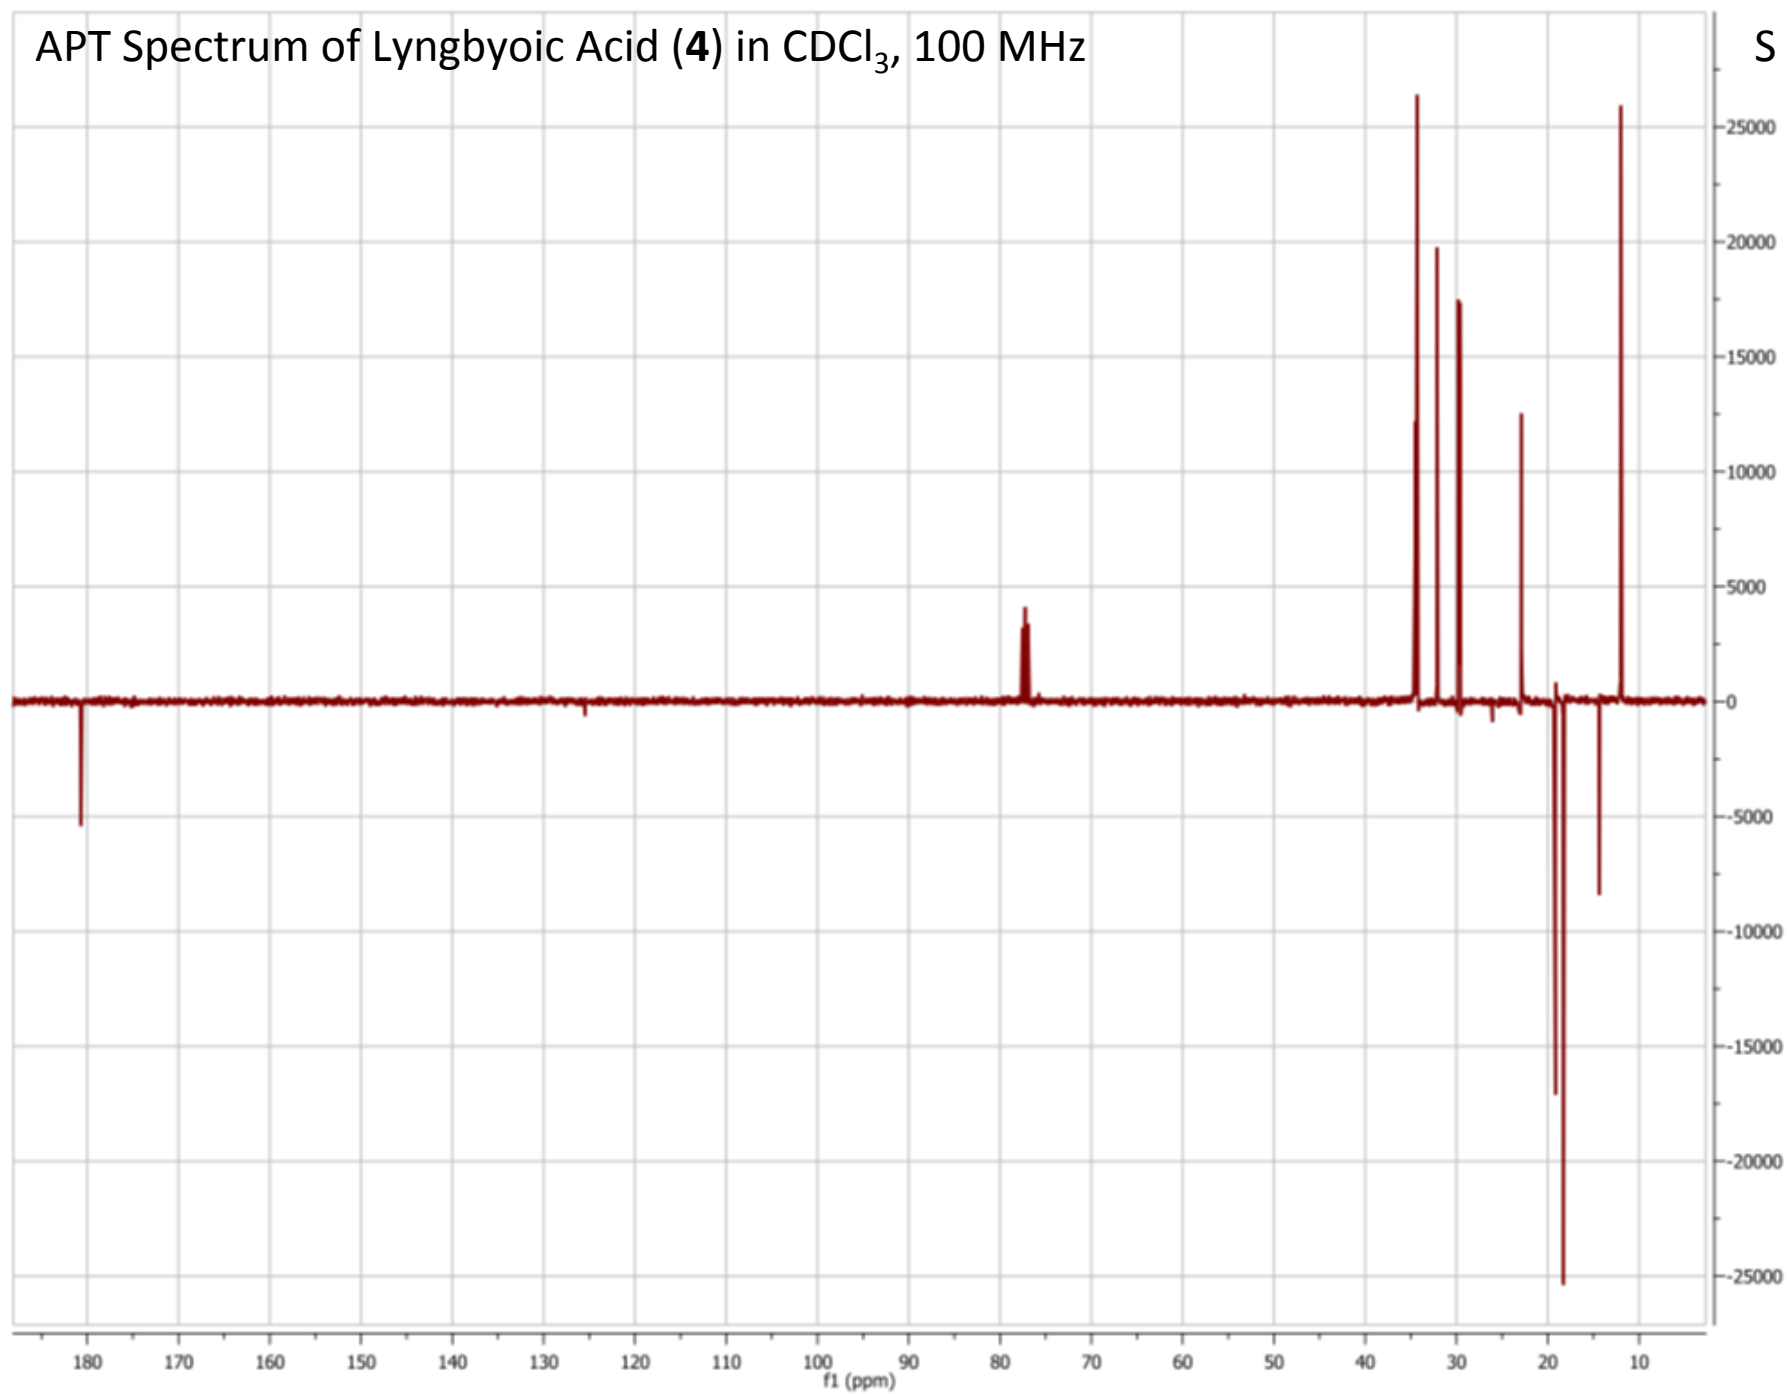

# COSY Spectrum of Lyngbyoic Acid (**4**) in CDCl<sub>3</sub>, 500 MHz

S 13

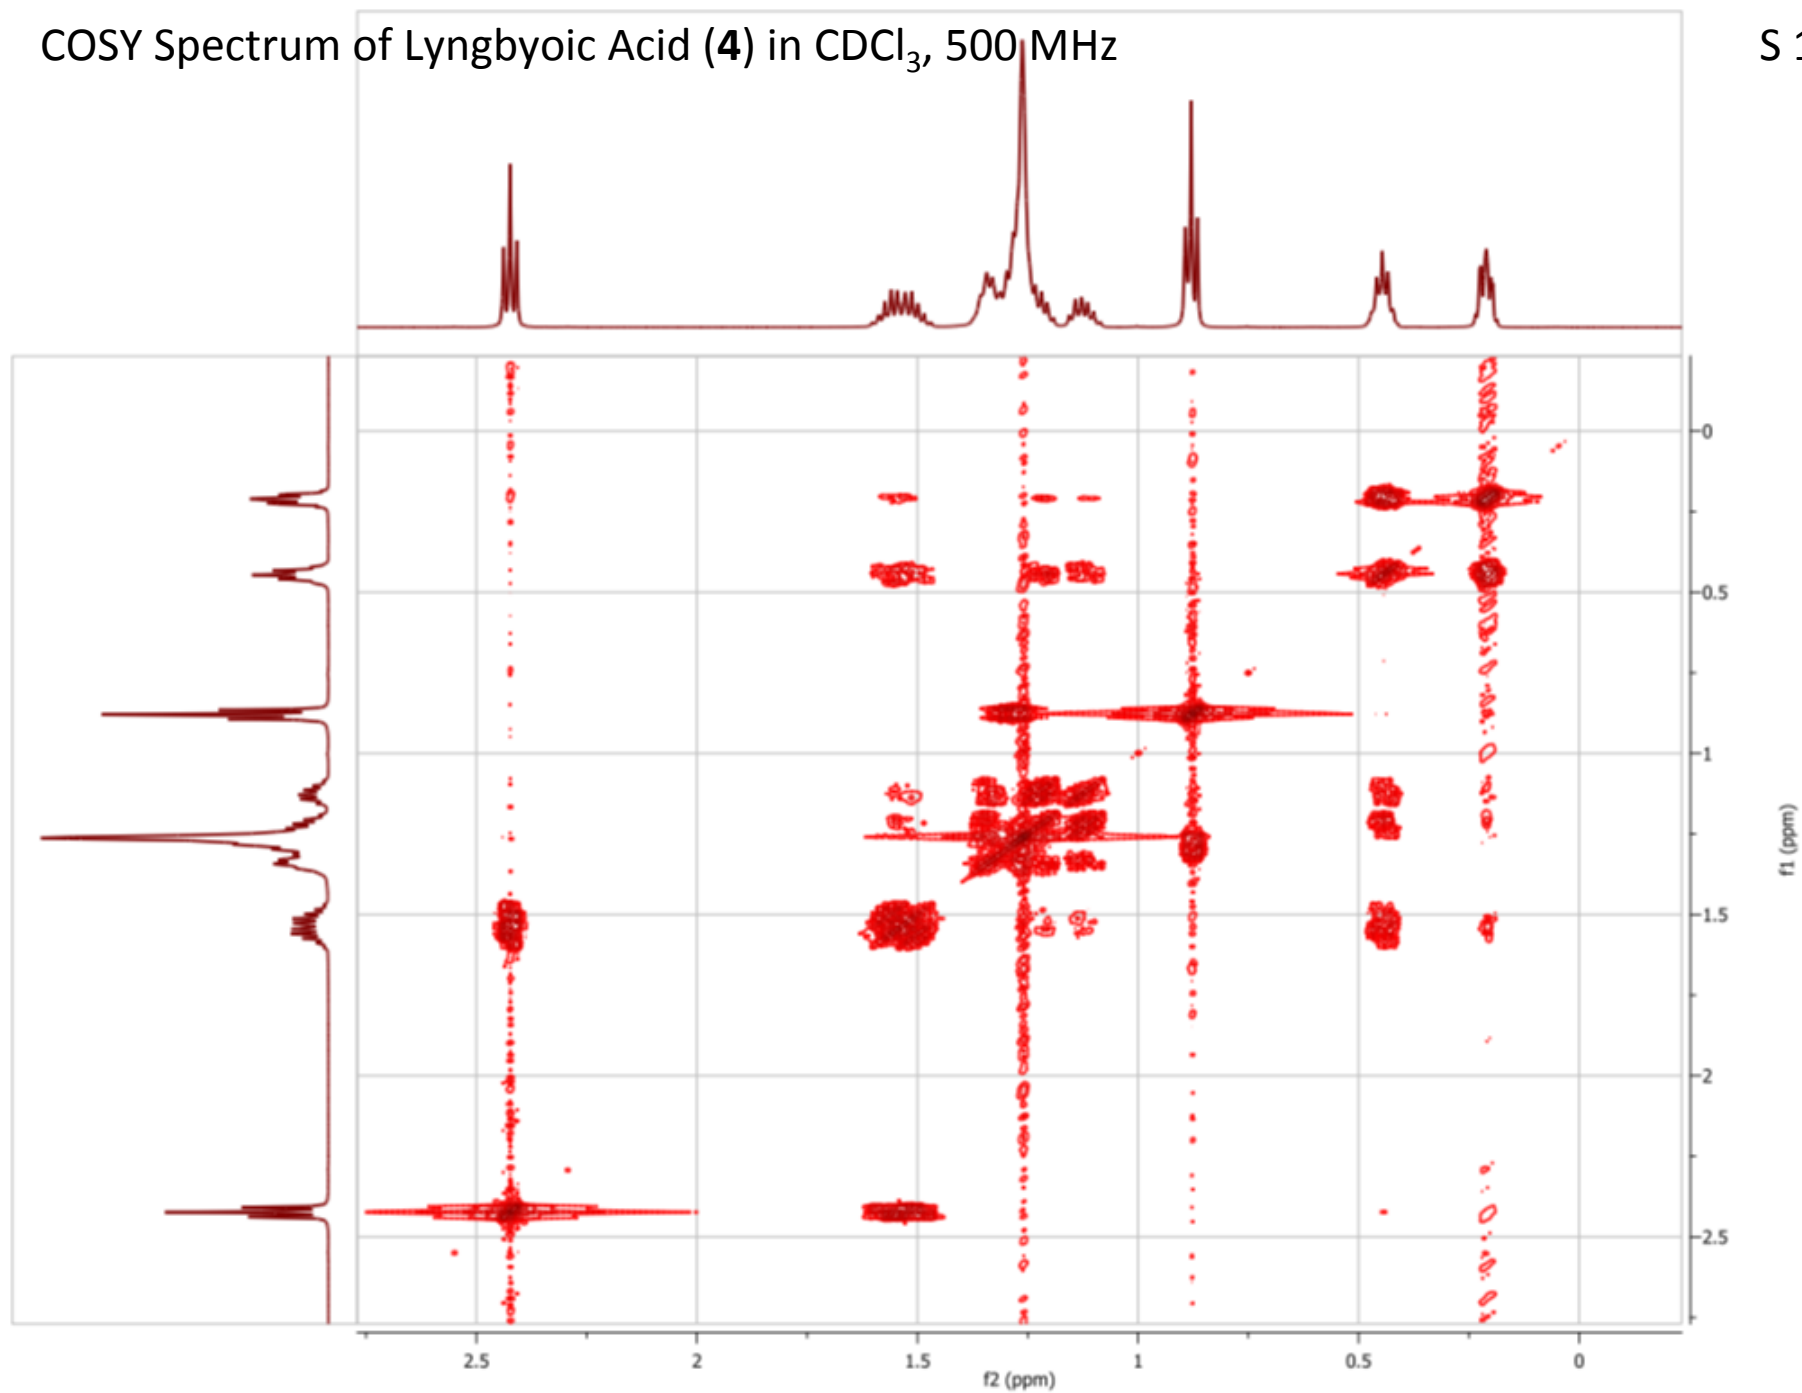

# HSQC Spectrum of Lyngbyoic Acid (**4**) in CDCl<sub>3</sub>, 500 MHz

S 14

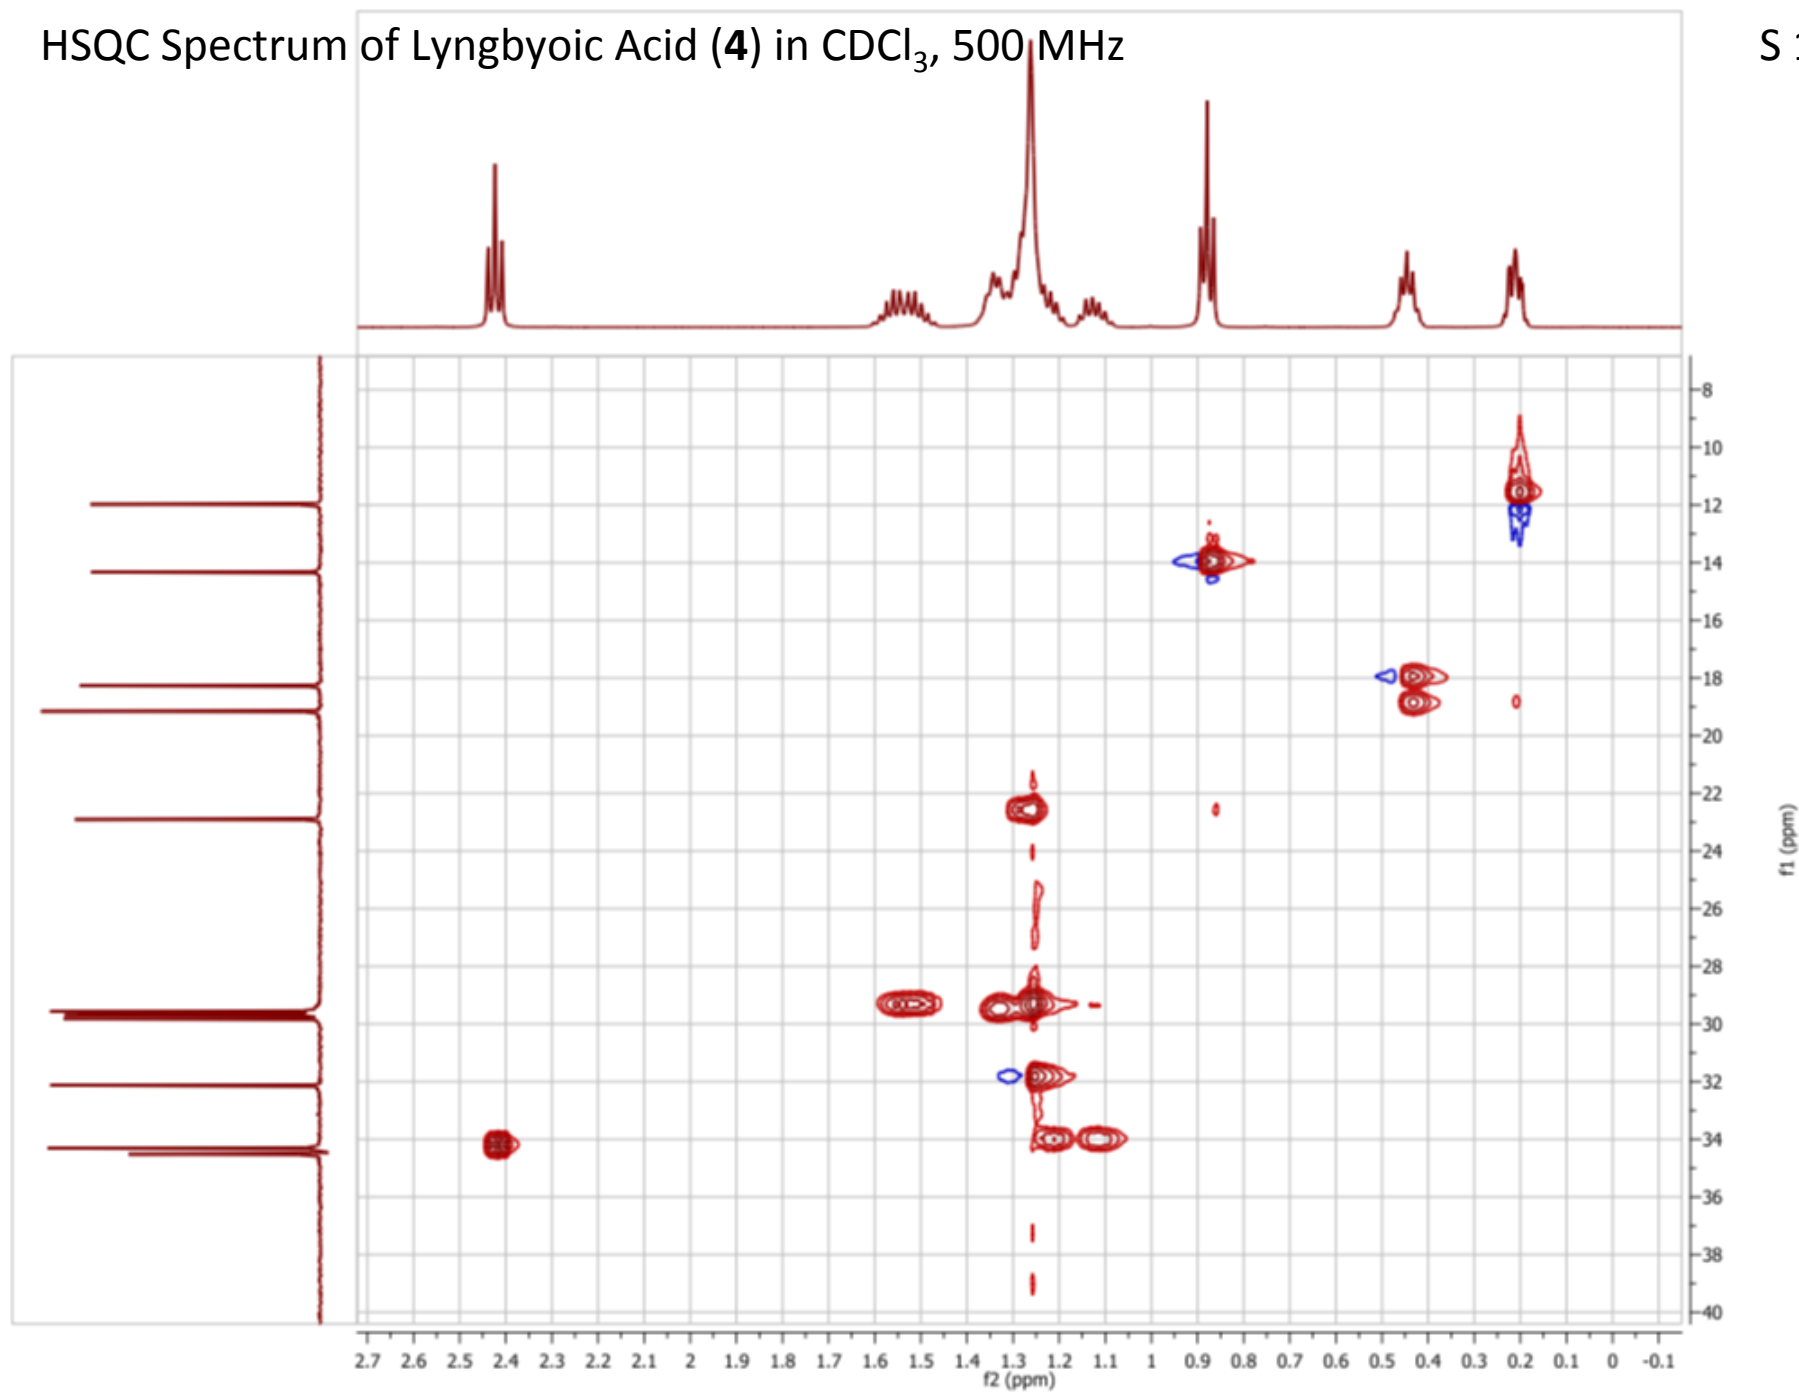

# HMBC Spectrum of Lyngbyoic Acid (**4**) in CDCl<sub>3</sub>, 500 MHz

S 15

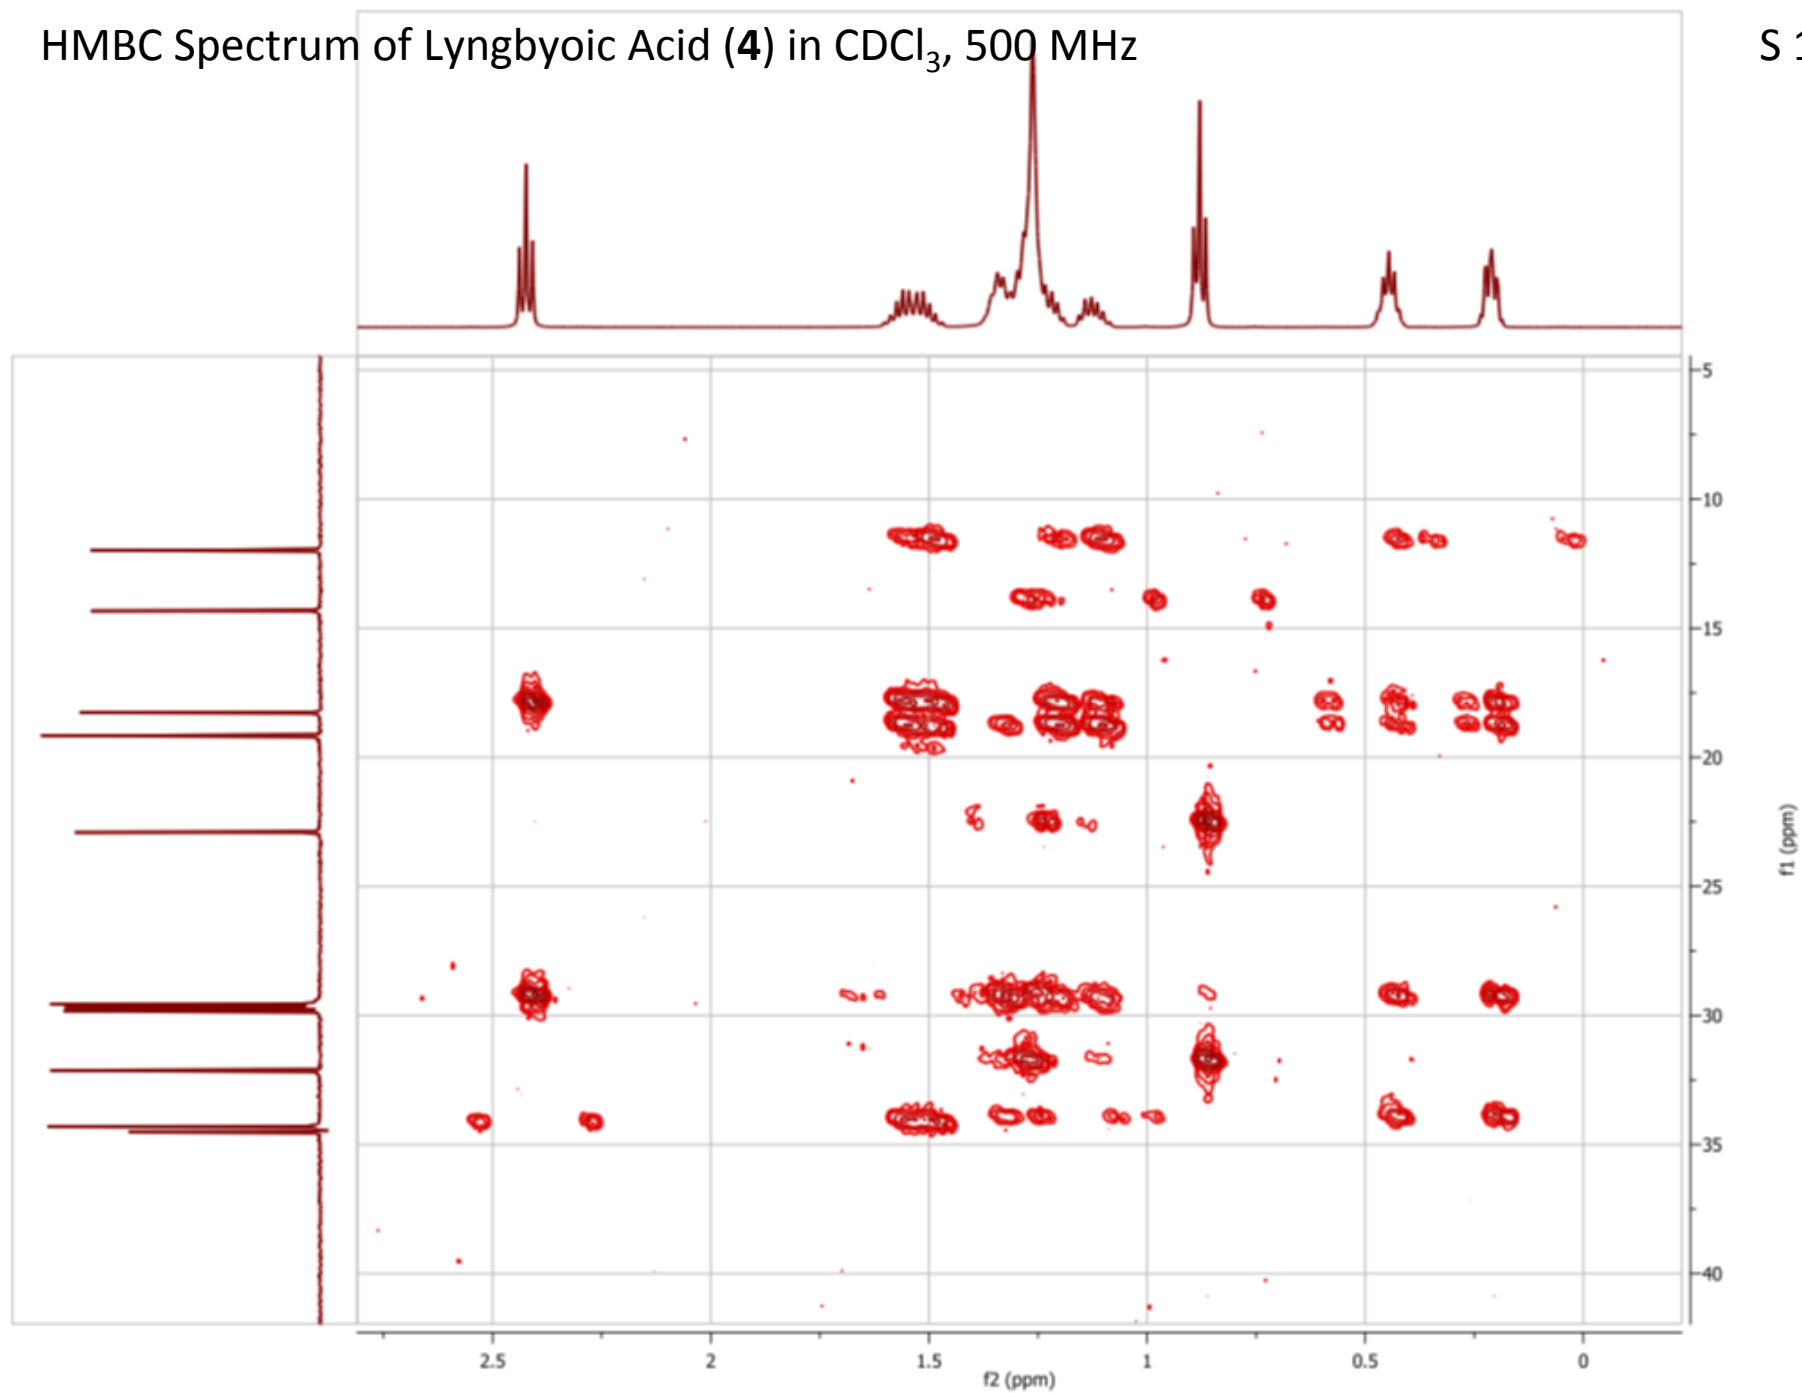

# HMBC Spectrum of Lyngbyoic Acid (**4**) in CDCl<sub>3</sub>, 500 MHz

S 16

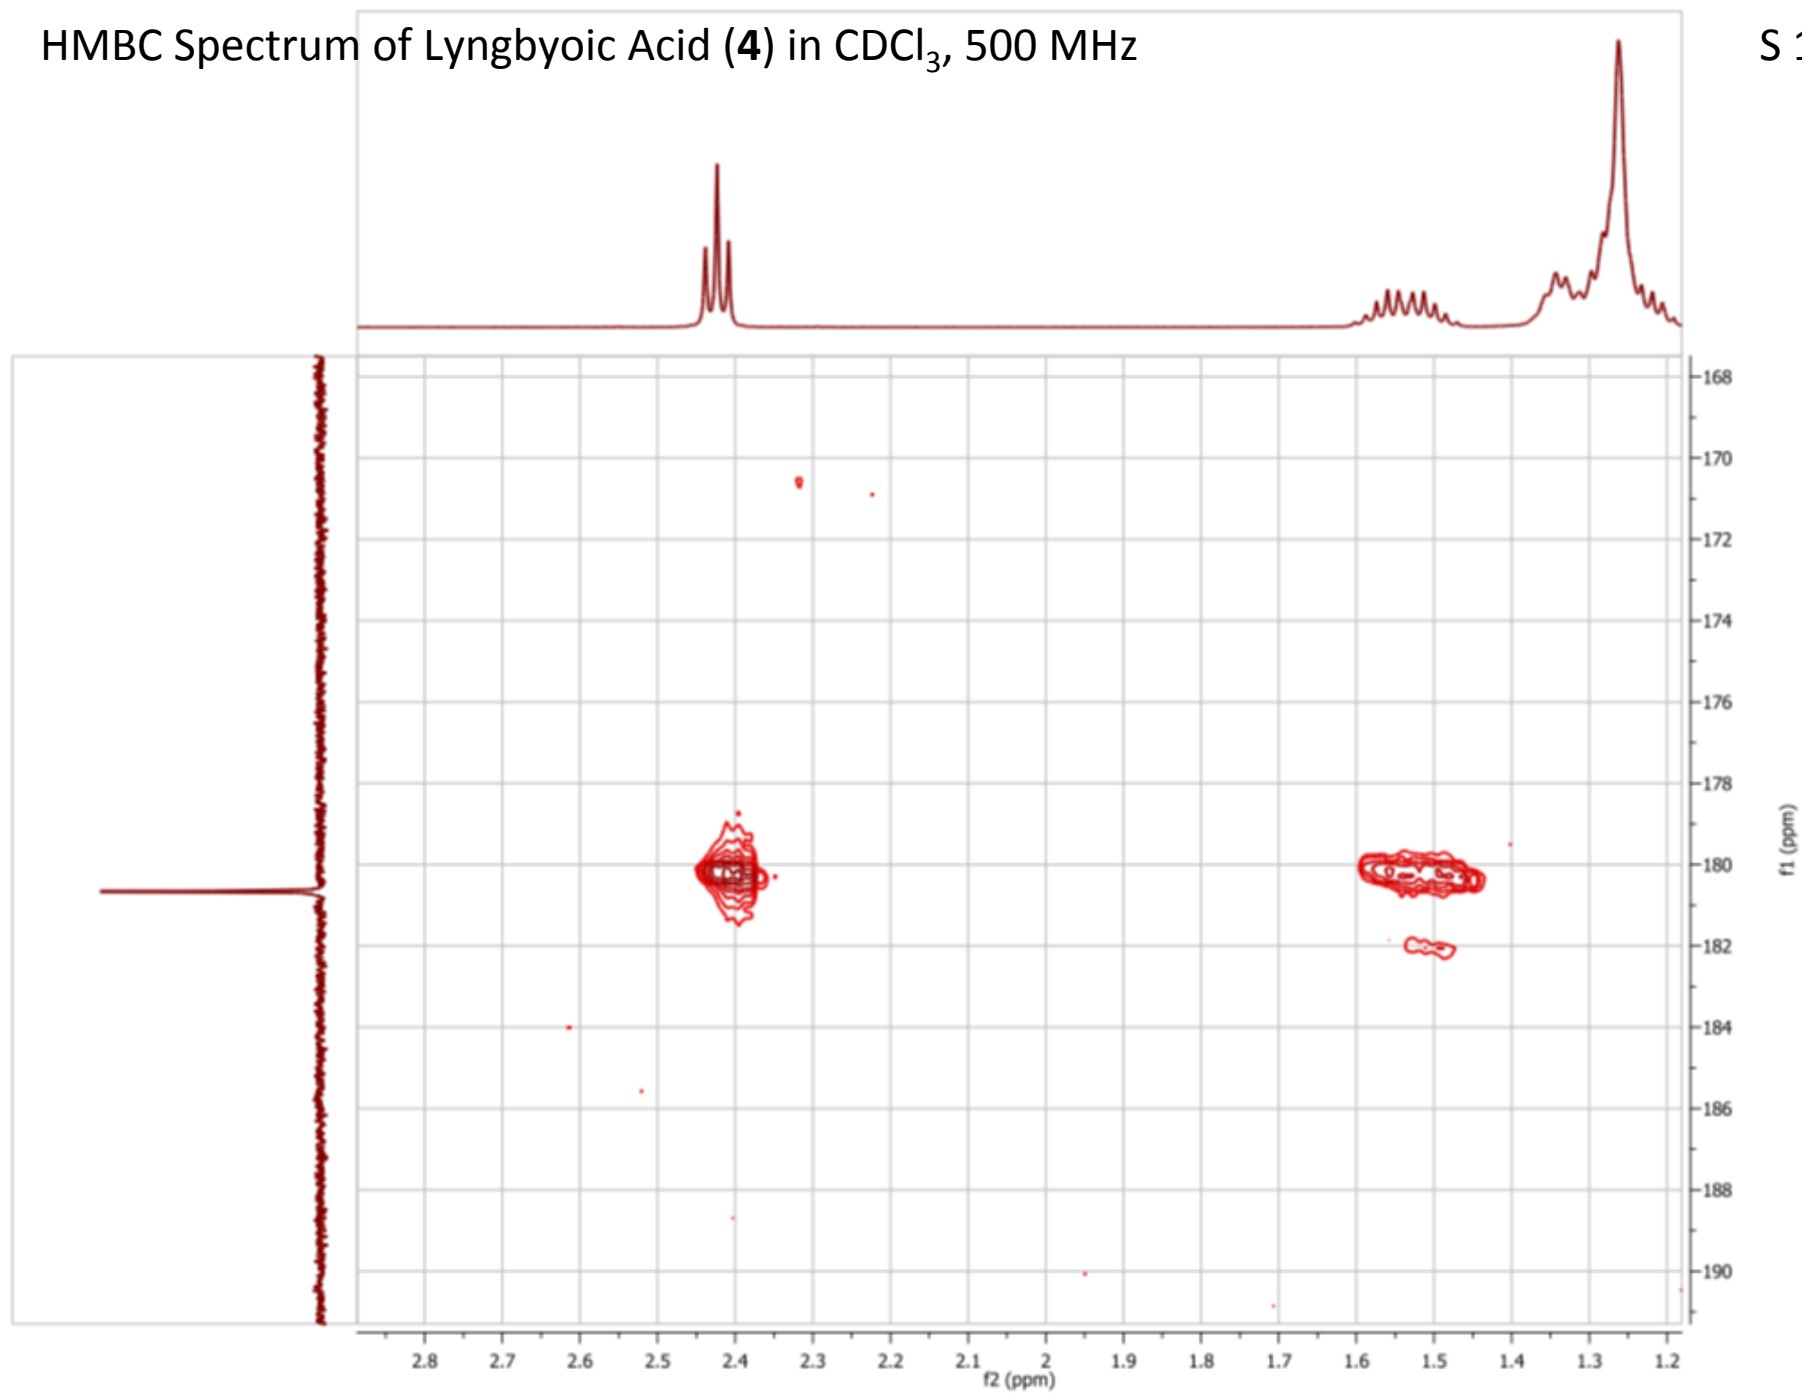



# TOCSY Spectrum of Lyngbyoic Acid (4) in CDCl<sub>3</sub>, 500 MHz

S 17

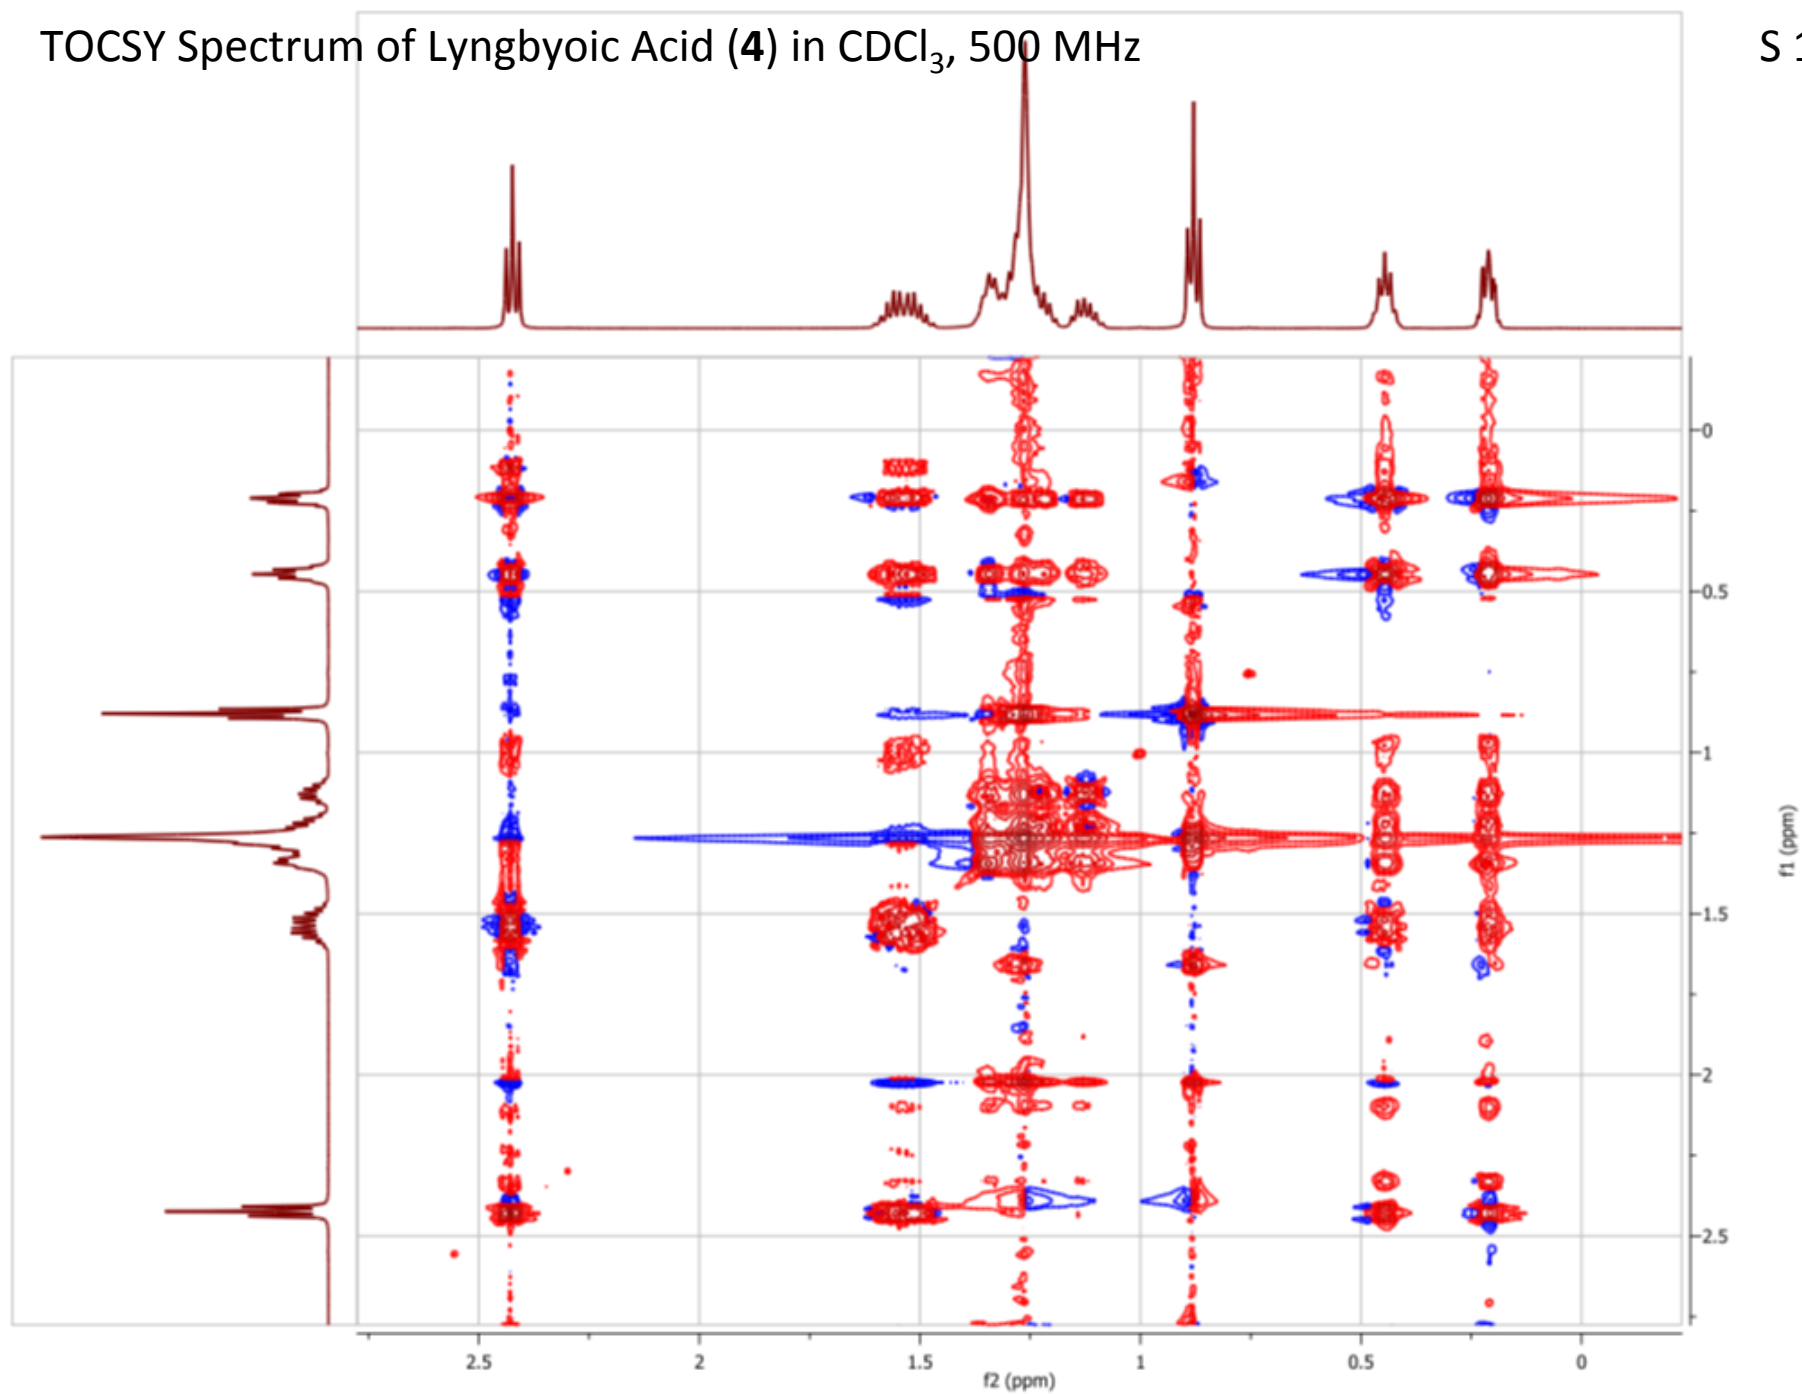

Supplement: c0mb00180e.pdf [file c0mb00180e.pdf]
